# Supplementary material for: Simultaneous preservation of the DNA quality, the community composition and the density of freshwater oligochaetes for the development of genetically based biological indices
Source: PeerJ journal article supplement (doi:10.7717/peerj.6050), 2018-12-05
Supplement: Supplemental_Figure_S1.pdf [file Supplemental_Figure_S1.pdf]

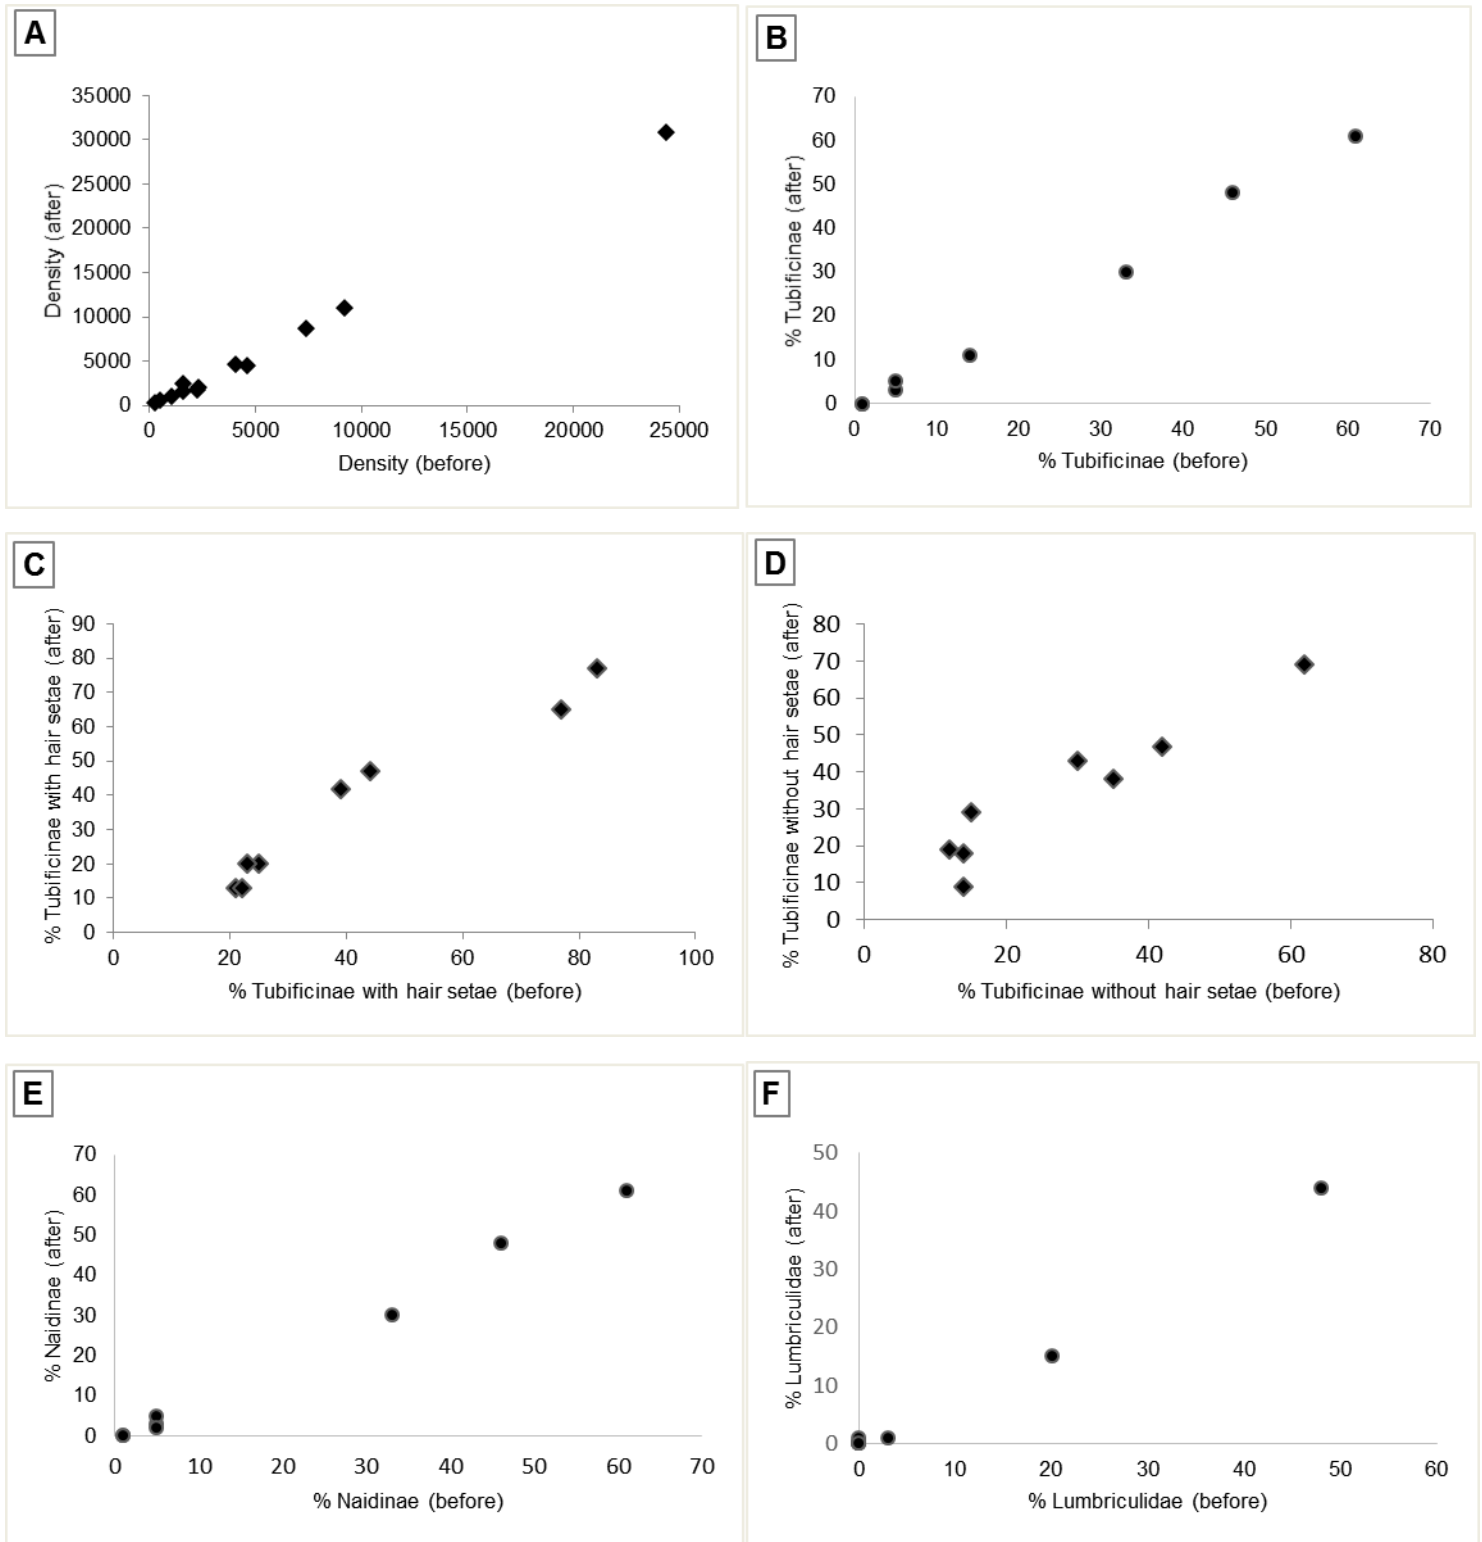

Supplemental Figure S1. Relationships between the percentages of oligochaete densities and families/subfamilies obtained before and after the addition of absolute ethanol to formalin-fixed oligochaete communities. Oligochaete densities per 0.1 m<sup>2</sup> (A), Tubificinae (B), Tubificinae with hair setae (C), Tubificinae without hair setae (D), Naidinae (E) and Lumbriculidae (F)
